# Supplementary material for: Isogenic human pluripotent stem cell pairs reveal the role of a KCNH2 mutation in long-QT syndrome
Source: PubMed Central journal article supplement (PMC3981141; doi:10.1038/emboj.2013.240), 2013-11-08

Full unedited gel for Figure 2

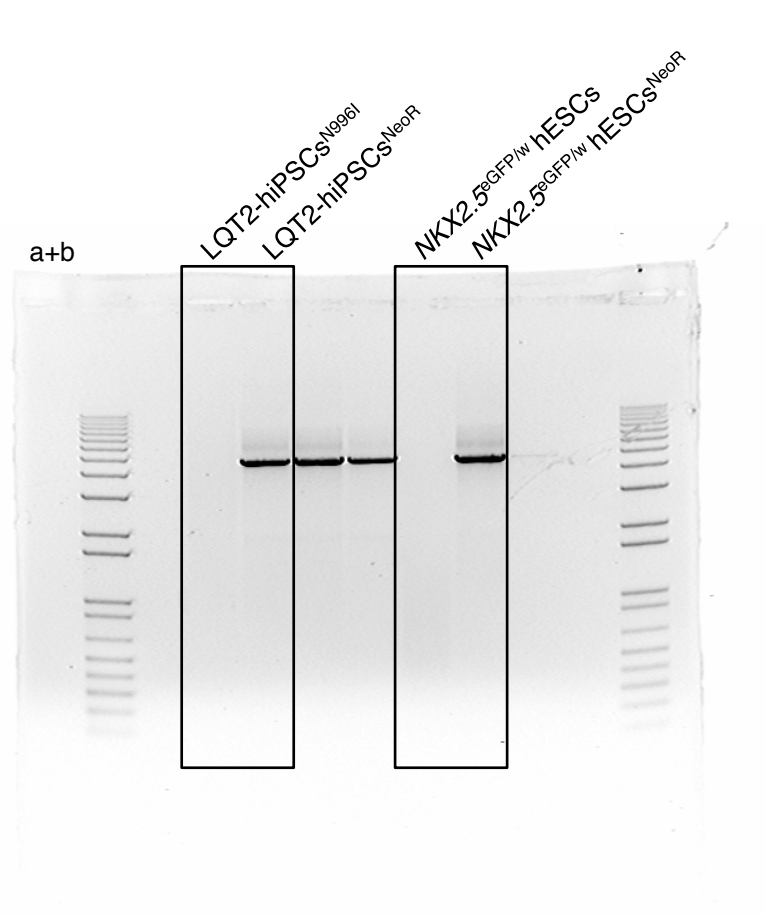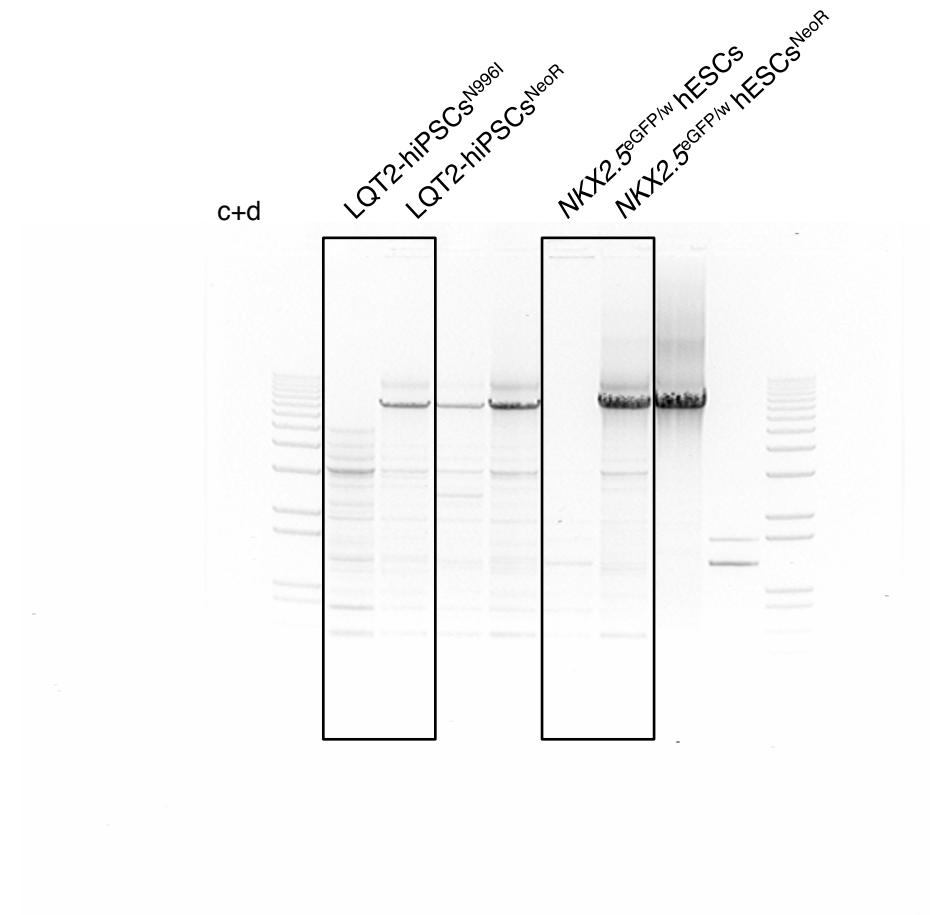

Supplement: emboj2013240df2.pdf [file emboj2013240df2.pdf]
