# Supplementary material for: Isogenic human pluripotent stem cell pairs reveal the role of a KCNH2 mutation in long-QT syndrome
Source: PubMed Central journal article supplement (PMC3981141; doi:10.1038/emboj.2013.240), 2013-11-08

# Full unedited Western Blots for Figure 8

HERG in hESC-CMs #1 (for image and quantification in Figure 8)

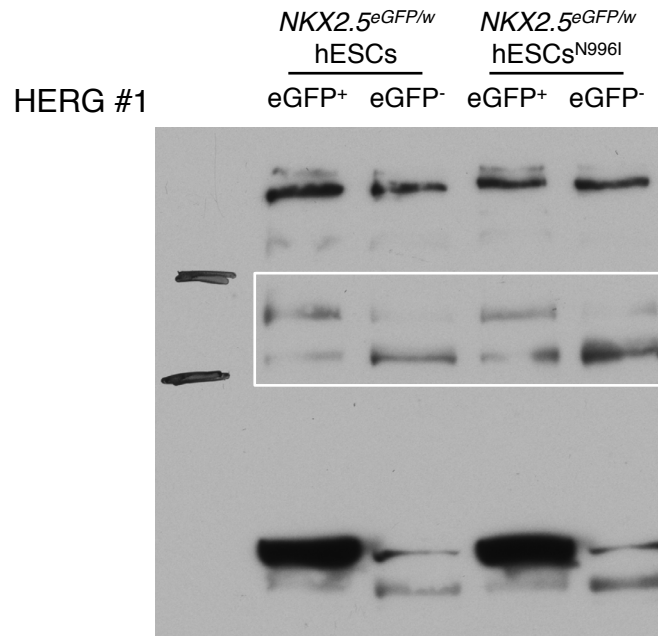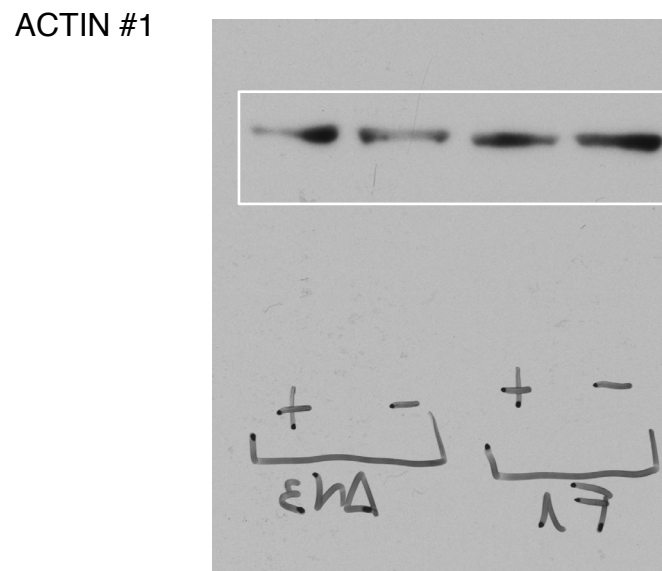

HERG in hESC-CMs #2 (for quantification in Figure 8)

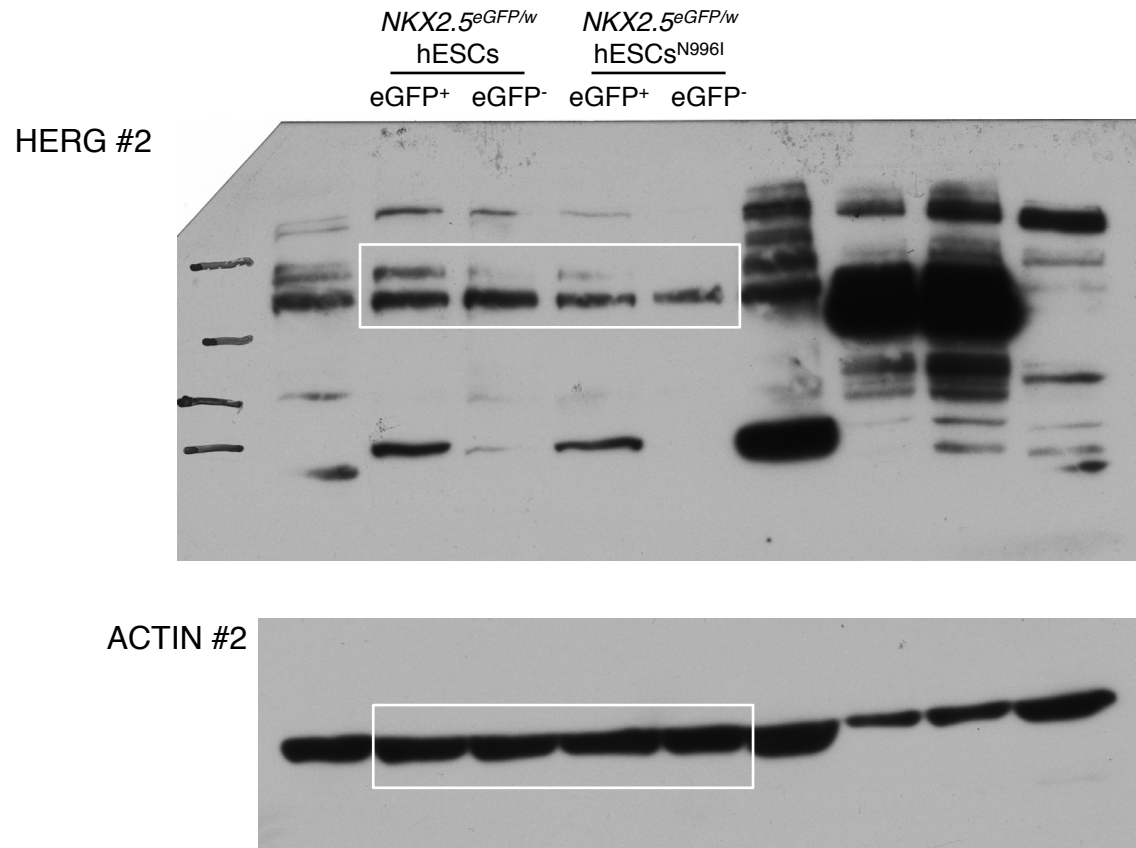

HERG in hESC-CMs #3 (for quantification in Figure 8)

*NKX2.5<sup>eGFP/w</sup>*      *NKX2.5<sup>eGFP/w</sup>*  
hESCs                      hESCs<sup>N996I</sup>  
eGFP<sup>+</sup> eGFP<sup>-</sup>      eGFP<sup>+</sup> eGFP<sup>-</sup>

HERG #3

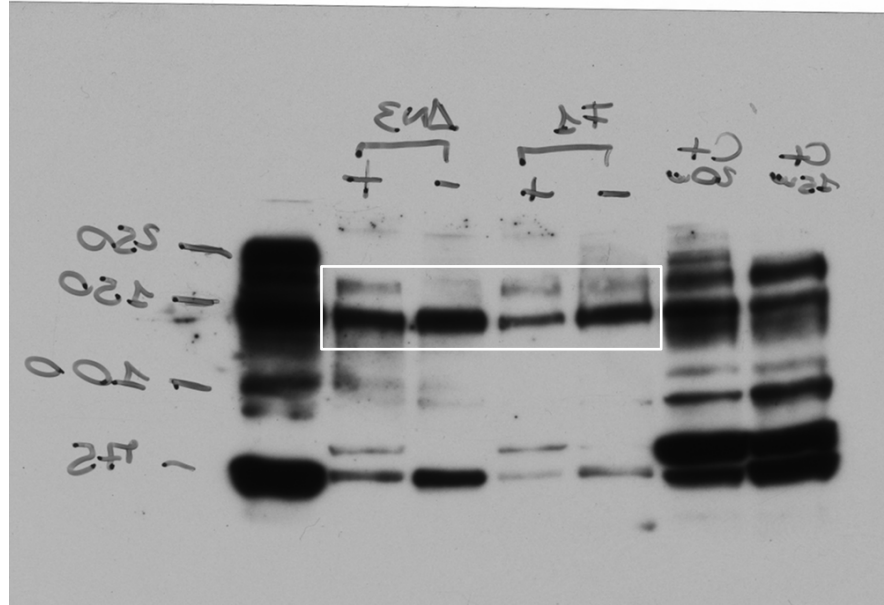

ACTIN#3

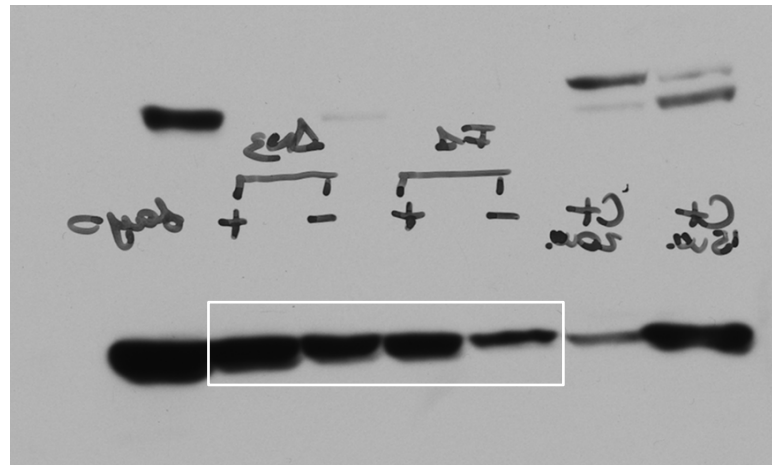

HERG in hESC-CMs #4 (for quantification in Figure 8)

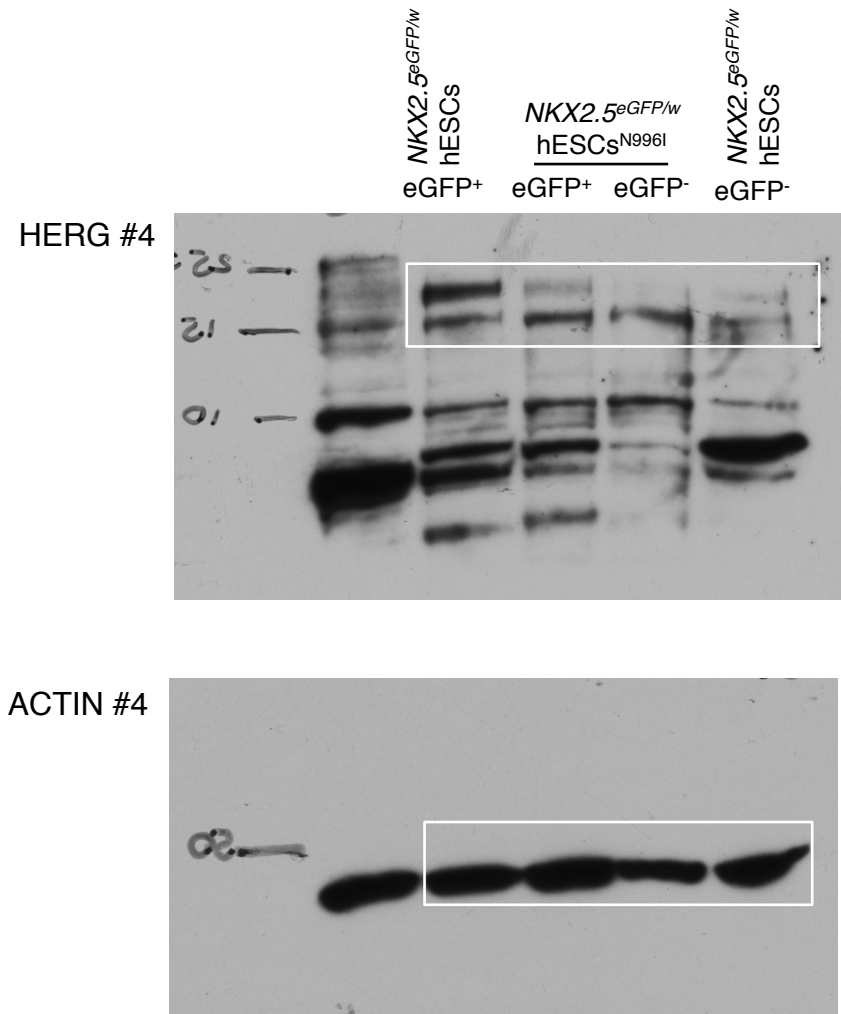

HERG in hiPSC-CMs #1 (for image and quantification in Figure 8)

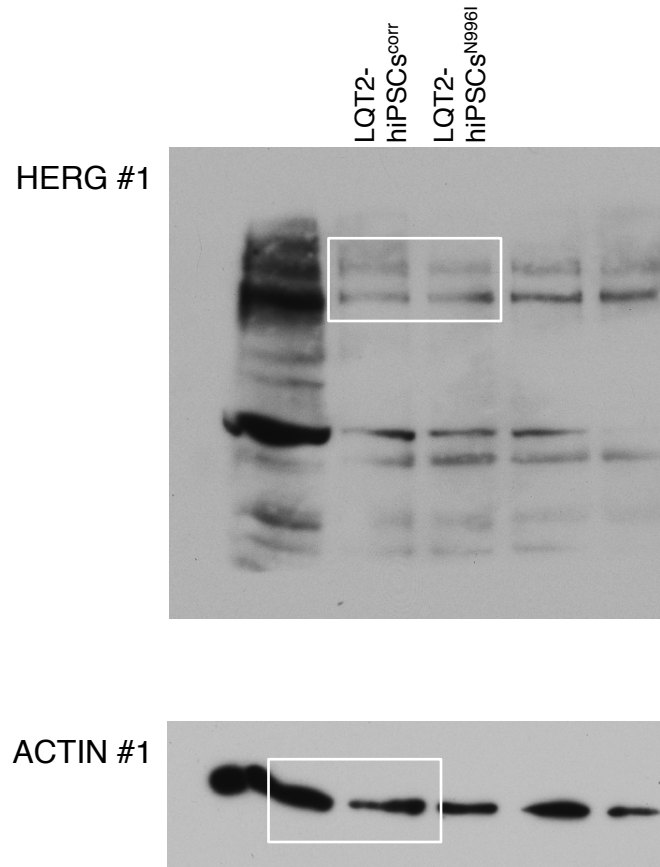

HERG in hiPSC-CMs #2 (for quantification in Figure 8)

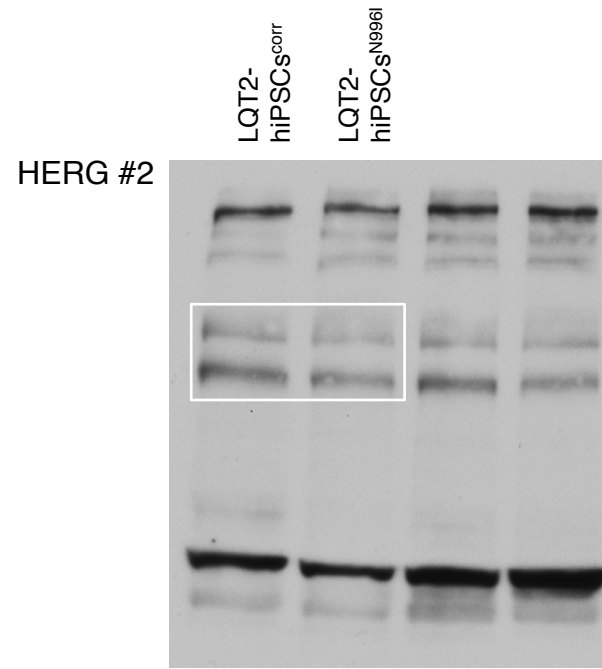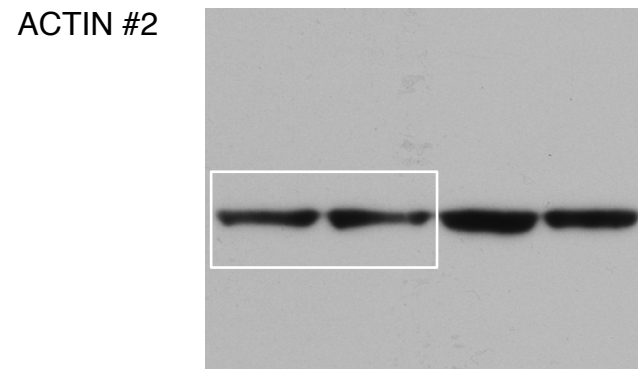

Supplement: emboj2013240df8.pdf [file emboj2013240df8.pdf]
