# Supplementary material for: Isogenic human pluripotent stem cell pairs reveal the role of a KCNH2 mutation in long-QT syndrome
Source: PubMed Central journal article supplement (PMC3981141; doi:10.1038/emboj.2013.240), 2013-11-08

Full unedited Western Blots for Figure 9

ATF6 in hESC-CMs (for Figure 9)

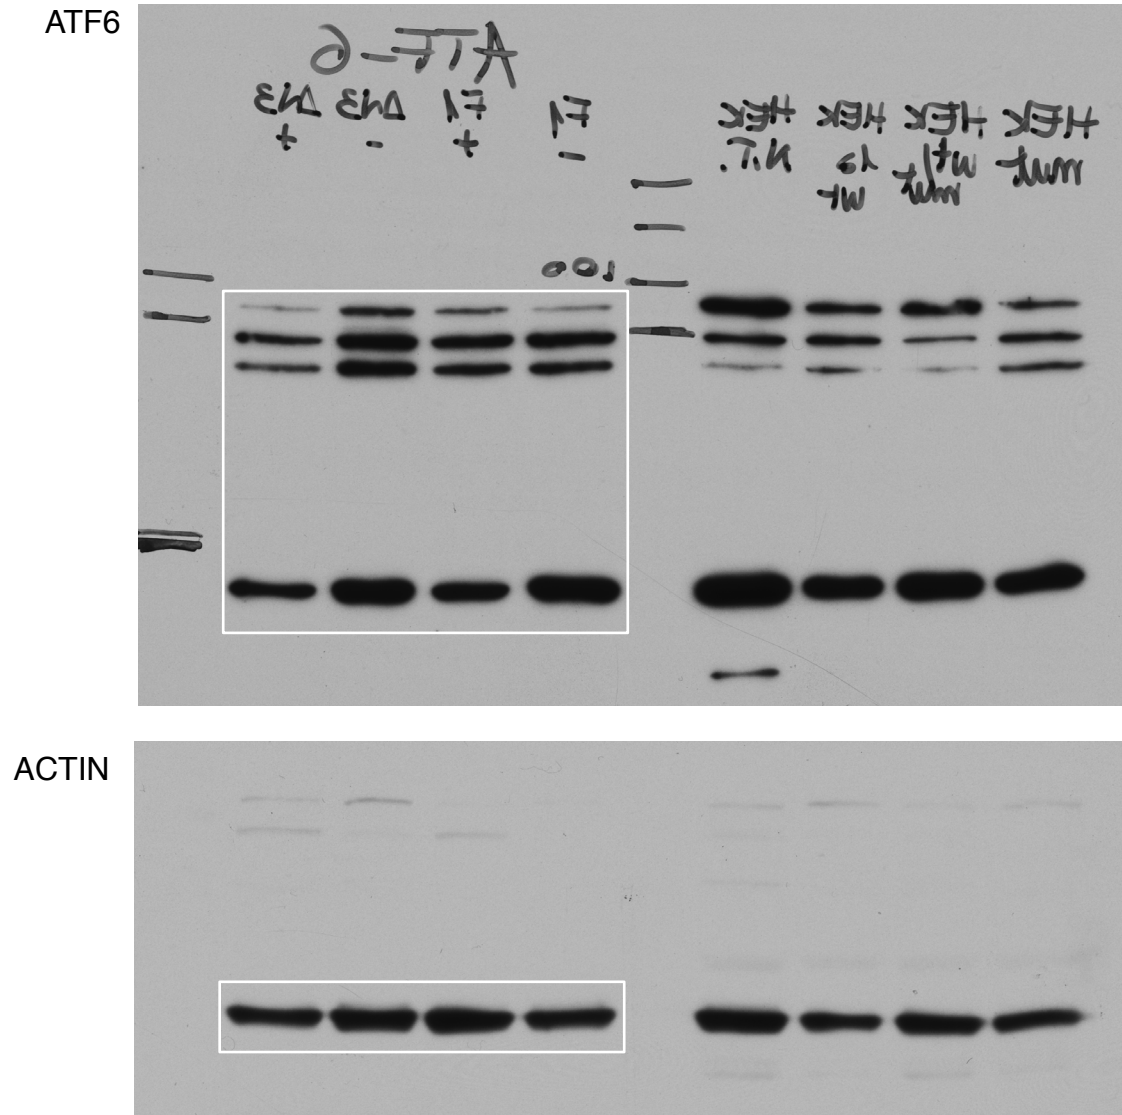

CALNEXIN in hESC-CMs (for Figure 9)

CALNEXIN

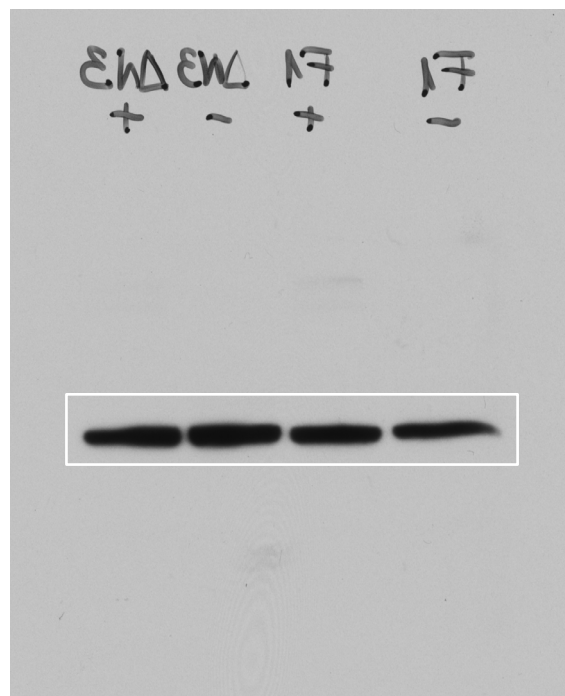

ACTIN

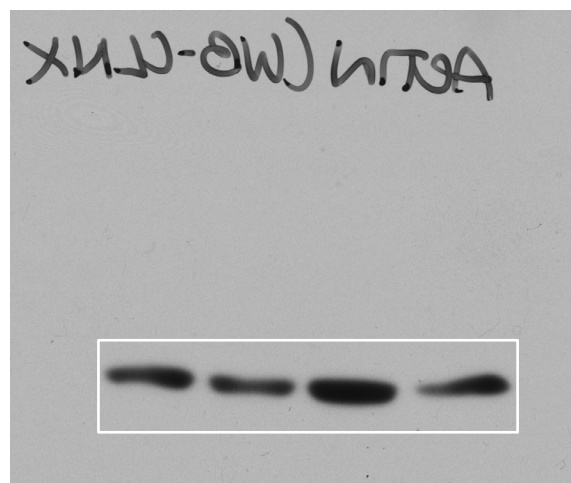

CALRETICULIN in hESC-CMs (for Figure 9)

CALRETICULIN

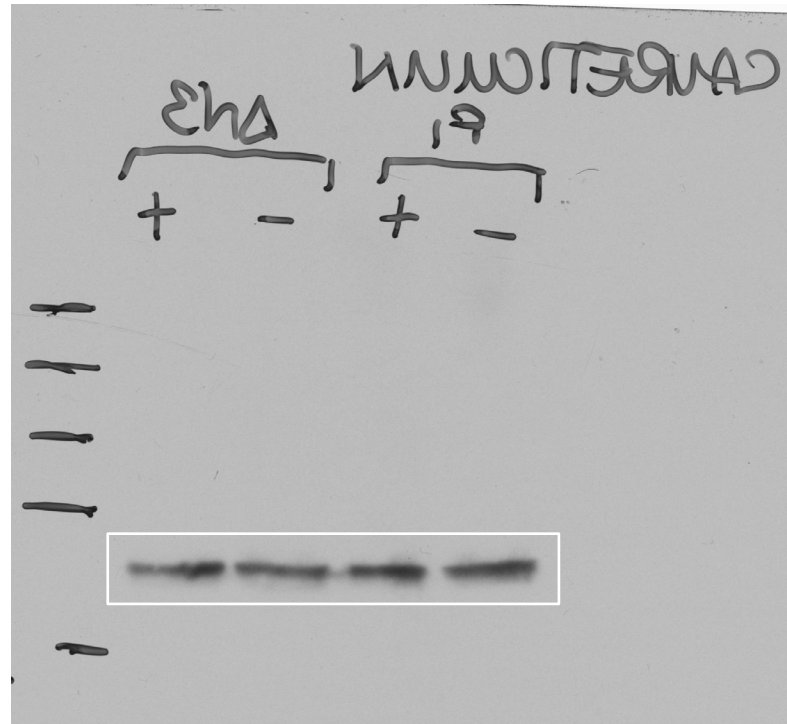

ACTIN

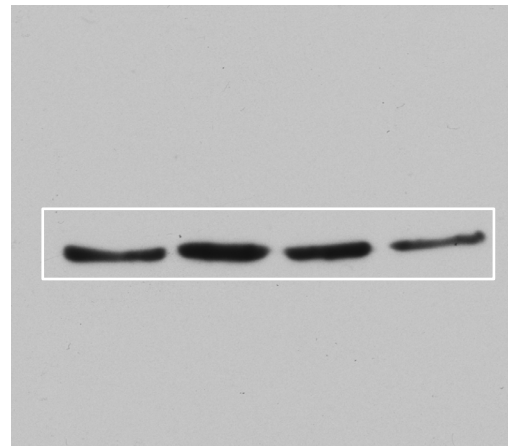

Inhibitors Treatment in hESC-CMs (for Figure 9)

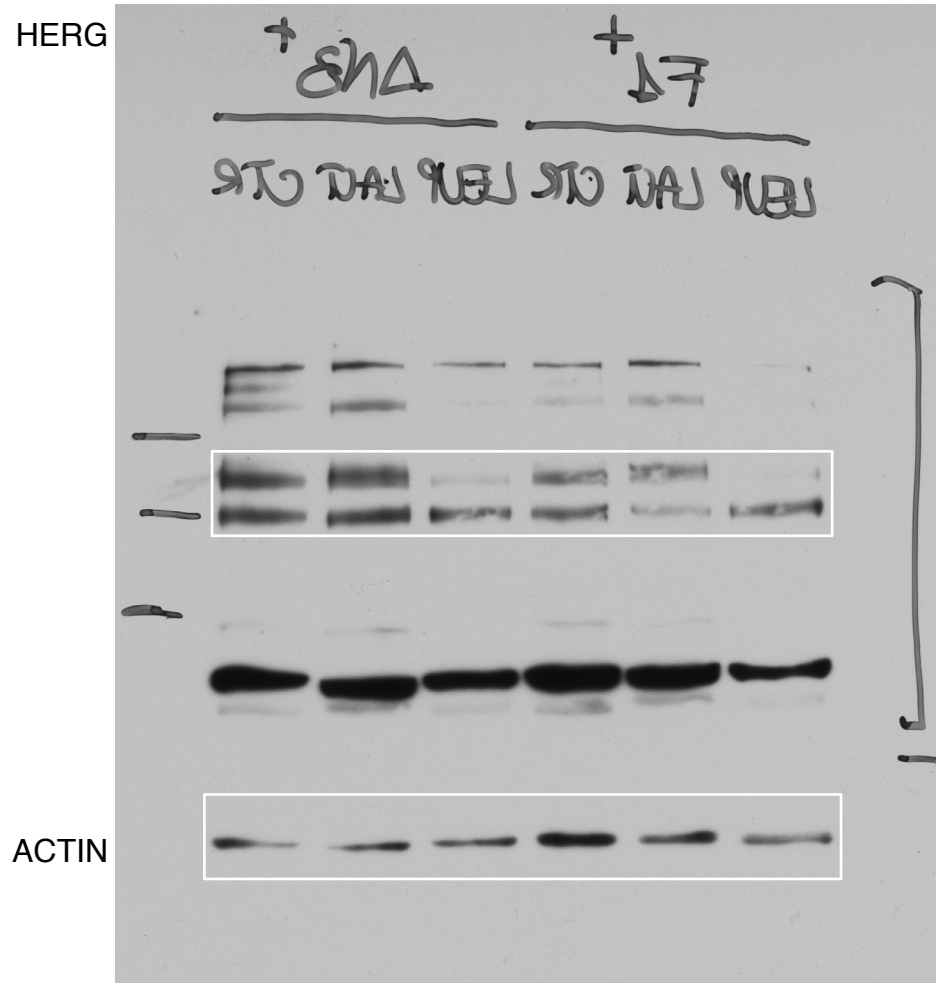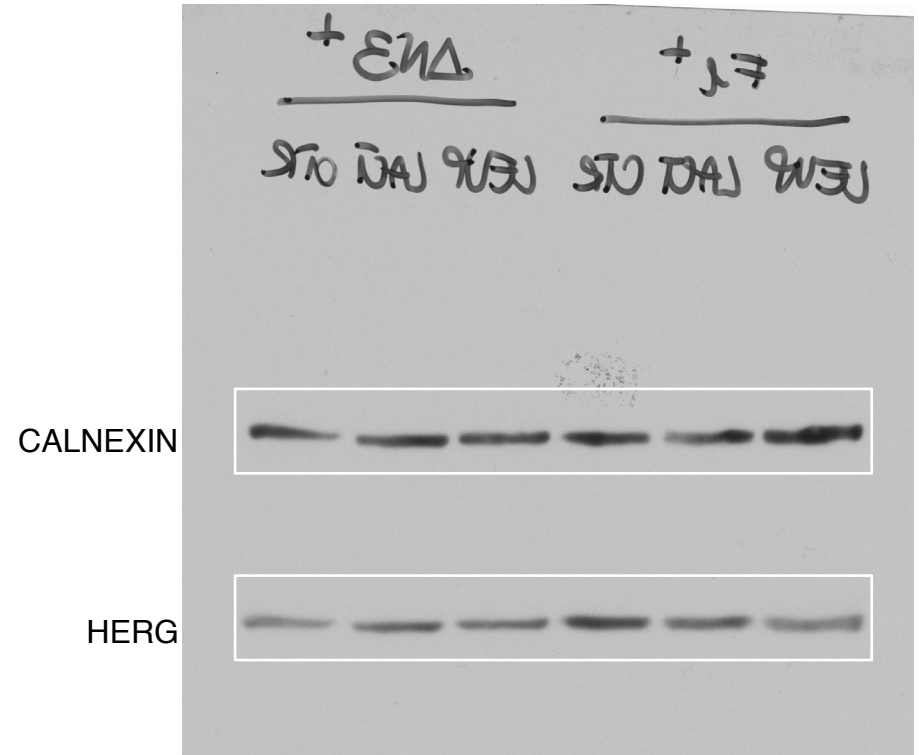

Supplement: emboj2013240df9.pdf [file emboj2013240df9.pdf]
