# Supplementary material for: Isogenic human pluripotent stem cell pairs reveal the role of a KCNH2 mutation in long-QT syndrome
Source: PubMed Central journal article supplement (PMC3981141; doi:10.1038/emboj.2013.240), 2013-11-08
Supplement: emboj2013240s1.pdf [file emboj2013240s1.pdf]

## **Supplementary Information**

This appendix has been provided by the authors to give readers additional information about their work.

Supplement to: Bellin, et al. Isogenic human pluripotent stem cell pairs reveal the role of a KCNH2 mutation in long-QT syndrome

**Supplementary Table S1.** Primers used for genotyping, screening for targeted clones, and for qRT-PCR.

| <b>Gene</b>                  | <b>Use</b>          | <b>Primer forward</b>                   | <b>Primer reverse</b>                     |
|------------------------------|---------------------|-----------------------------------------|-------------------------------------------|
| <i>KCNH2 (genotyping)</i>    | Sequencing          | ATGGAGGACTGCGAGAAGAG                    | TACCTGAGAAAGCGAGTCCA                      |
| <i>KCNH2 (a+b)</i>           | Targeting screening | CTGGGTTCTGTACGCTCCTG                    | CACCTTCCAGCTCCACTCTC                      |
| <i>KCNH2 (c+d)</i>           | Targeting screening | AGACTATGGCGTGTGTGGTT                    | GGGCTGACCGCTTCCCTCGTGC                    |
| <i>KCNH2 (neo excised)</i>   | Neo excision test   | TCGATGGATGCAGAGTGTGC                    | CACCTTCCAGCTCCACTCTC                      |
| <i>KCNH2 (exon1)</i>         | Sequencing          | CCGAAGCCTAGTGCTGGGCC                    | ATCCACACTCGGAAGAGCTC                      |
| <i>KCNH2 (exon2)</i>         | Sequencing          | GGCTGTGTGAGTGGAGAATG                    | ATCTCCCAGACCTGTACCT                       |
| <i>KCNH2 (exon3)</i>         | Sequencing          | ATCATAGCCAGCGTGAGAAA                    | CCAAAGAAATGAGACCACGA                      |
| <i>KCNH2 (exon4)</i>         | Sequencing          | GGTGTGAGAGACAGGGATGA                    | TAATAGCGCAACAAGCCACT                      |
| <i>KCNH2 (exon5)</i>         | Sequencing          | TGCTTCCCTTAGAGTGGGACA                   | CTTGGCCTGGAAGAATTAGG                      |
| <i>KCNH2 (exon1b)</i>        | Sequencing          | TCCTCCCTTGCTTCTCTCTT                    | TCCCAAAGCTTCTACTTCC                       |
| <i>KCNH2 (exon6)</i>         | Sequencing          | AACTGTTTGGAGCCAGTCCT                    | GAGGAGCTTGTGTGGAGAGA                      |
| <i>KCNH2 (exons7-8)</i>      | Sequencing          | CACCTCTTAGGAGGAGGGTCT                   | GCCTGAGACTTGTTTGCTGT                      |
| <i>KCNH2 (exon9)</i>         | Sequencing          | TGGGATGGTGGAGTAGAGTG                    | CACATGGCCCTTAGTGAAAC                      |
| <i>KCNH2 (exons10-11)</i>    | Sequencing          | GTGATTGGCTAAGAGGGTGT                    | GGCCCTCCTTTGTTCTATGT                      |
| <i>KCNH2 (exons12-13-14)</i> | Sequencing          | CTTCCTGCCAGTCCTCTCT                     | GTCTCGGGCTCAGTCAGTTC                      |
| <i>KCNH2 (exon15)</i>        | Sequencing          | CCACCTGACTCTCCTCTTGG                    | AGGAAGTGGGTGAGGGAGAC                      |
| <i>MYC endogenous</i>        | qRT-PCR             | AGAAATGTCCTGAGCAATCACC                  | AAGGTTGTGAGGTTGCATTGA                     |
| <i>KLF4 endogenous</i>       | qRT-PCR             | ATAGCCTAAATGATGGTGCTTGG                 | AACTTTGGCTTCCTTGTTGG                      |
| <i>OCT4 endogenous</i>       | qRT-PCR             | GACAGGGGGAGGGGAGGAGCTAGG <sup>1</sup>   | CTTCCCTCCAACCAGTTGCCCAAAC <sup>(1)</sup>  |
| <i>SOX2 endogenous</i>       | qRT-PCR             | GGGAAATGGGAGGGGTGCAAAAGAGG <sup>1</sup> | TTGCGTGAGTGTGGATGGGATTGGTG <sup>(1)</sup> |
| <i>LEFTYA</i>                | qRT-PCR             | TACAGGTGTCCGGTGCAGAGG                   | ATTGGTGCTTCAGGGTCACA                      |
| <i>NANOG</i>                 | qRT-PCR             | TGCAAGAACTCTCCAACATCCT                  | ATTGCTATTCTTCGCCAGTT                      |
| <i>REX1</i>                  | qRT-PCR             | ACCAGCACACTAGGCAAACC                    | TTCTGTTACACAGGCTCCA                       |
| <i>TDGF1</i>                 | qRT-PCR             | CCCAAGAAGTGTCCCTGTG                     | ACGTGCAGACGGTGGTAGTT                      |
| <i>MYC transgene</i>         | qRT-PCR             | GGAAACGACGAGAACAGTTGA                   | CCCTTTTTCTGGAGACTAAATAAA <sup>(1)</sup>   |
| <i>KLF4 transgene</i>        | qRT-PCR             | CCACCTCGCCTTACACATGA                    | CCCTTTTTCTGGAGACTAAATAAA <sup>(1)</sup>   |
| <i>OCT4 transgene</i>        | qRT-PCR             | GCTCTCCCATGCATTCAAAC                    | TTATCGTCGACCACTGTGCTGCTG <sup>(1)</sup>   |
| <i>SOX2 transgene</i>        | qRT-PCR             | GGCCATTAACGGCACACTG                     | CCCTTTTTCTGGAGACTAAATAAA <sup>(1)</sup>   |

|                 |         |                          |                         |
|-----------------|---------|--------------------------|-------------------------|
| <i>PDX1</i>     | qRT-PCR | AAGCTCACGCGTGGAAG        | GGCCGTGAGATGTA CT TGTG  |
| <i>PTF1A</i>    | qRT-PCR | GGCCAGAAAGGTCATCATC      | TAGGGGAGGGAGGCCATA      |
| <i>SOX7</i>     | qRT-PCR | TGAACGCCTTCATGGTTTG      | AGCGCCTTCCACGACTTT      |
| <i>AFP</i>      | qRT-PCR | GTGCCAAGCTCAGGGTGTAG     | CAGCCTCAAGTTGTTCTCTG    |
| <i>CD31</i>     | qRT-PCR | ATGCCGTGGAAAGCAGATAC     | CTGTTCTTCTCGGAACATGGA   |
| <i>DES</i>      | qRT-PCR | GTGAAGATGGCCCTGGATGT     | TGGTTTCTCGGAAGTTGAGG    |
| <i>ACTA2</i>    | qRT-PCR | GTGATCACCATCGGAAATGAA    | TCATGATGCTGTTGTAGGTGGT  |
| <i>SCL</i>      | qRT-PCR | CCAACAATCGAGTGAAGAGGA    | CCGGCTGTTGGTGAAGATAC    |
| <i>MYL2</i>     | qRT-PCR | TACGTTCCGGAAATGCTGAC     | TTCTCCGTGGGTGATGATG     |
| <i>MYH11</i>    | qRT-PCR | GGAGGCCAAGATTGCACAG      | CAGCAAGATTTCTTCAGCTTC   |
| <i>CDH5</i>     | qRT-PCR | GAGCATCCAGGCAGTGGTAG     | CAGGAAGATGAGCAGGGTGA    |
| <i>KRT14</i>    | qRT-PCR | CACCTCTCCTCCTCCAGTT      | ATGACCTTGGTGCGGATTT     |
| <i>NCAM1</i>    | qRT-PCR | CAGATGGGAGAGGATGGAAA     | CAGACGGGAGCCTGATCTCT    |
| <i>TH</i>       | qRT-PCR | TGTACTGGTTCACGGTGGAGT    | TCTCAGGCTCCTCAGACAGG    |
| <i>GABRR2</i>   | qRT-PCR | CTGTGCCTGCCAGAGTTTCA     | ACGGCCTTGACGTAGGAGA     |
| <i>TNNT2</i>    | qRT-PCR | AGCATCTATAACTTGGAGGCAGAG | TGGAGACTTTCTGGTTATCGTTG |
| <i>KCNH2-1a</i> | qRT-PCR | TGGGAGCTGCTTCCTATGTC     | TCCTTCTCCATCACCACCTC    |
| <i>KCNH2-1b</i> | qRT-PCR | AGGGAGCCAAGTCCTCCAT      | TTGTA CT CAGGCAGCACGTC  |
| <i>KCNE2</i>    | qRT-PCR | TGTGTGCAACCCAGAAGAGA     | CTTCCAGCGTCTGTGTGAAA    |
| <i>KCNQ1</i>    | qRT-PCR | CGCCTGAACCGAGTAGAAGA     | TGAAGCATGTCGGTGATGAG    |
| <i>KCNJ11</i>   | qRT-PCR | GACCCTTGGAGCAGTGTGT      | GCTTTATTGACAACGGAGAAGG  |
| <i>KCNJ12</i>   | qRT-PCR | TGGATCCTTTCCAGTTGGTG     | CGGCTCCTCTTGAGTTCTATCTT |
| <i>KCND3</i>    | qRT-PCR | CCAATTCTAACCTGCCAGCTAC   | CTGCTTTCAAATTAAGGCTGGA  |
| <i>SCN5A</i>    | qRT-PCR | GAGCTCTGTCACGATTTGAGG    | GAAGATGAGGCAGACGAGGA    |
| <i>CACNA1C</i>  | qRT-PCR | CAATCTCCGAAGAGGGGTTT     | TCGCTTCAGACATTCCAGGT    |
| <i>GAPDH</i>    | qRT-PCR | TCCTCTGACTTCAACAGCGA     | GGGTCTTACTCCTTGGAGGC    |

1. Takahashi, K., Tanabe, K., Ohnuki, M., Narita, M., Ichisaka, T., Tomoda, K., and Yamanaka, S. 2007. Induction of pluripotent stem cells from adult human fibroblasts by defined factors. *Cell* 131:861-872.

**A**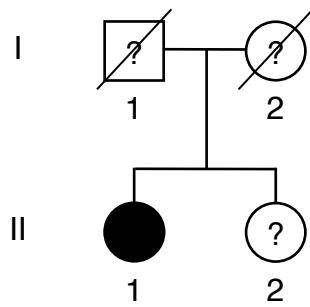**B**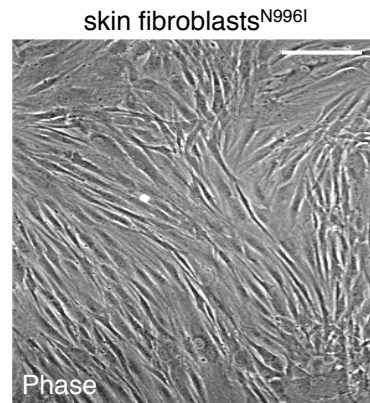

**Supplementary Figure S1.** Dermal fibroblasts from a patient with type-2 long-QT syndrome. **(A)** Family pedigree shows that patient II-1 is affected by LQT2. Squares indicate male family members, circles female family members, solid symbols family members with LQT2, open symbols with question mark genotype unknown. **(B)** Skin fibroblasts were grown from a skin biopsy from patient-II-1; scale bar: 200  $\mu\text{m}$ .

**A**

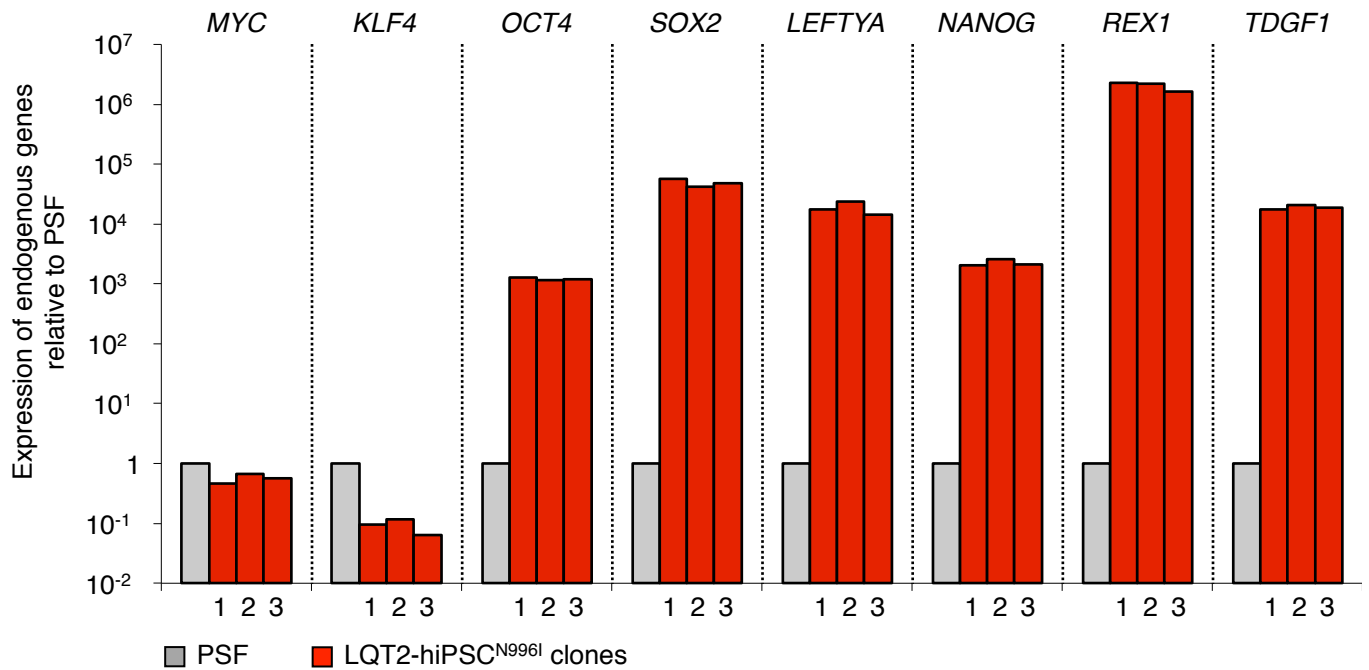

**B**

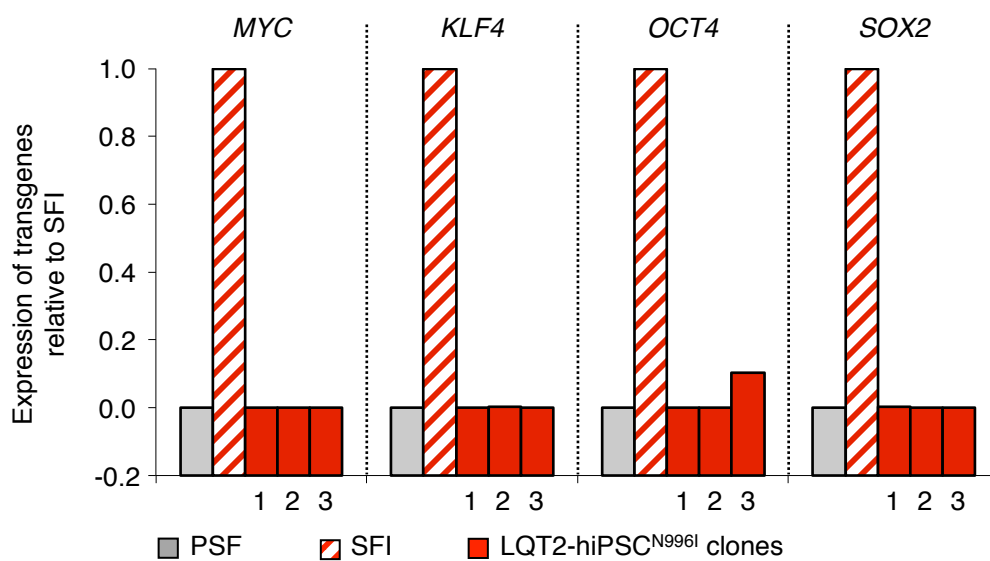

**Supplementary Figure S2.** Re-expression of endogenous genes associated with pluripotency and silencing of the transgenes in three LQT2-hiPSC<sup>N996I</sup> clones. **(A)** qRT-PCR analysis of the endogenous pluripotency associated-genes (*MYC*, *KLF4*, *OCT4*, *SOX2*, *LEFTYA*, *NANOG*, *REX1*, and *TDGF1*) reveals similar activation of these genes in all three LQT2-hiPSC<sup>N996I</sup> clones (1, 2, and 3, red bars). Expression values are relative to the primary skin fibroblasts from which they were derived (PSF, grey bars). **(B)** qRT-PCR analysis of the four transgenes used for the reprogramming, *MYC*, *KLF4*, *OCT4*, and *SOX2*, in all three LQT2-hiPSC<sup>N996I</sup> clones (1, 2, and 3, red bars). Transgenes silencing is demonstrated by expression levels similar to parental PSF (grey bar). Expression values are relative to skin fibroblasts after the retroviral transduction (SFI, red and white stripe bars). Expression values in panels A and B are normalized to *GAPDH*.

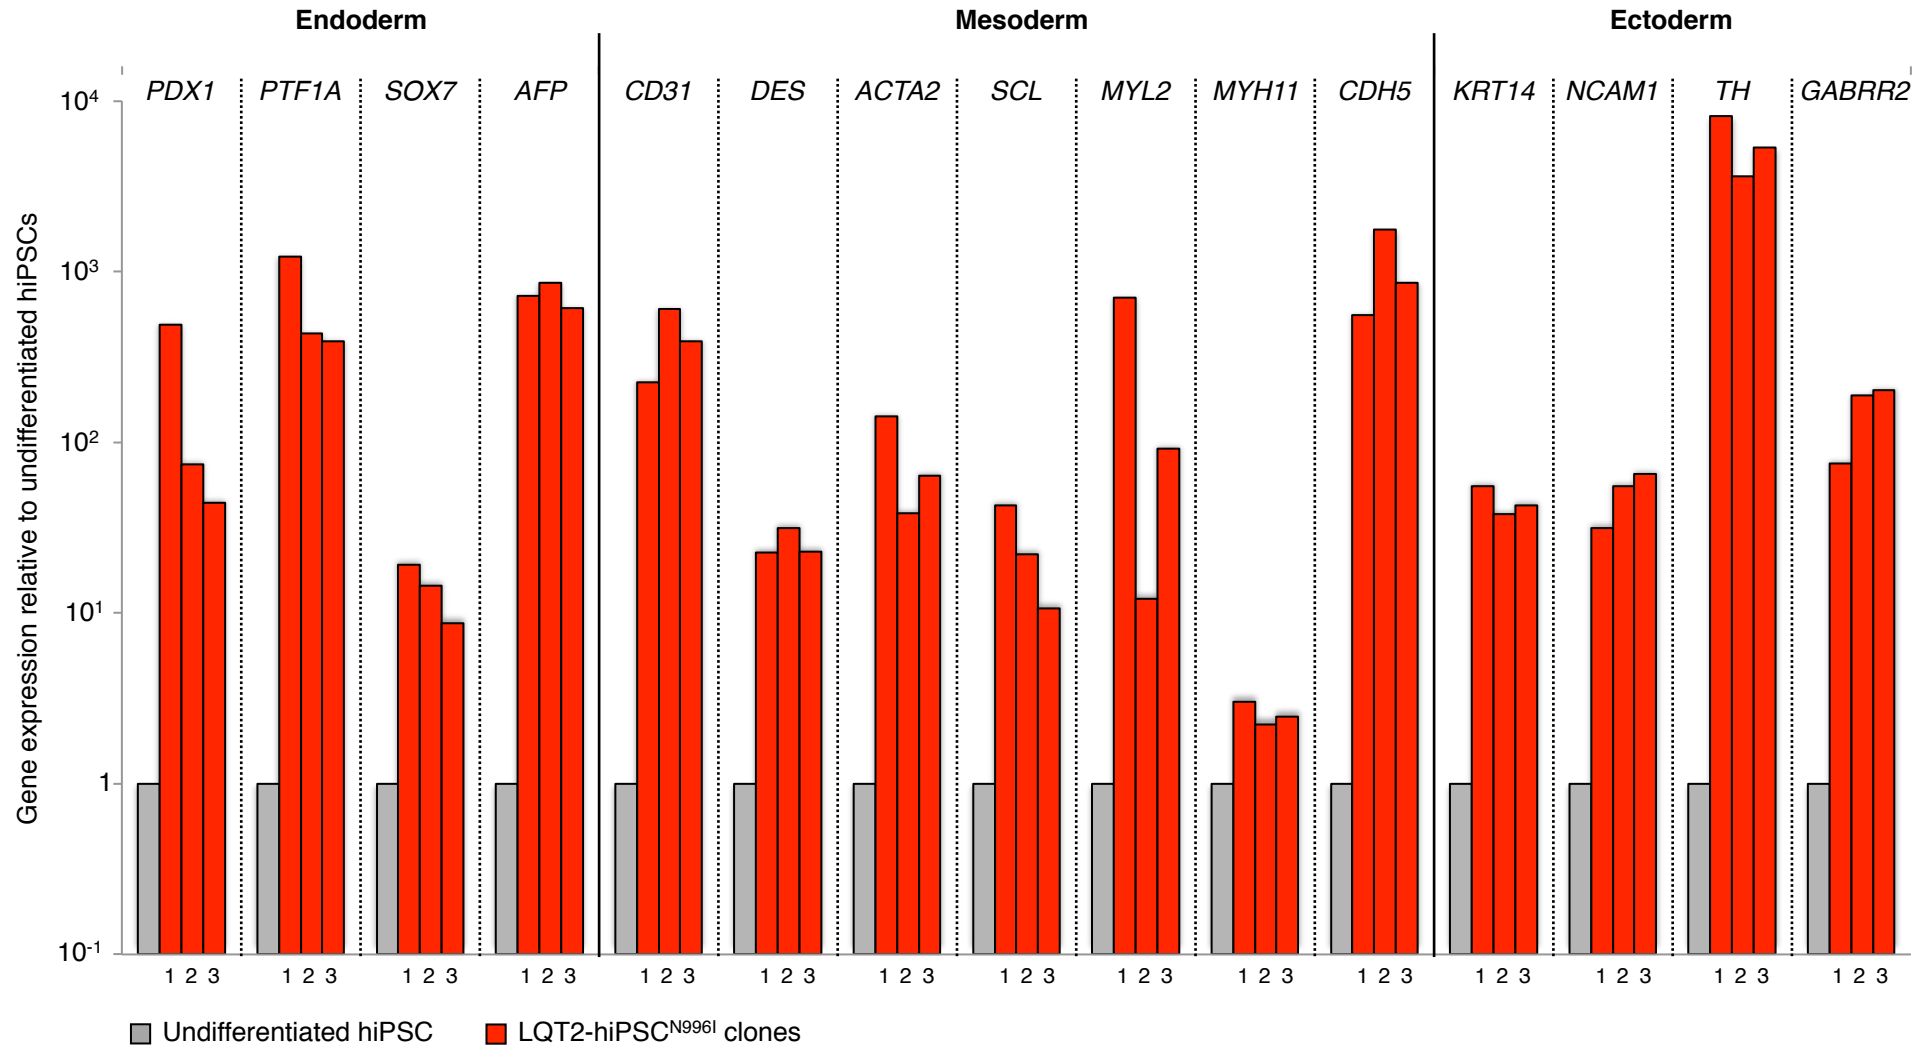

**Supplementary Figure S3.** Up-regulation of lineage markers representative of the three embryonic germ layers in three LQT2-iPSC<sup>N996I</sup> clones at day 21 following spontaneous differentiation. The bar graph shows qRT-PCR analysis of markers of the three different germ layers, endoderm (*PDX1*, *PTF1A*, *SOX7*, and *AFP*), mesoderm (*CD31*, *DES*, *ACTA2*, *SCL*, *MYL2*, *MYH11*, and *CDH5*), and ectoderm (*KRT14*, *NCAM1*, *TH*, and *GABRR2*) in embryoid bodies at day 21 of *in vitro* differentiation from three LQT2-iPSC<sup>N996I</sup> clones (1, 2, and 3, red bars). Gene expression values are relative to corresponding undifferentiated hiPSC clones (grey bar) and normalized to *GAPDH*.

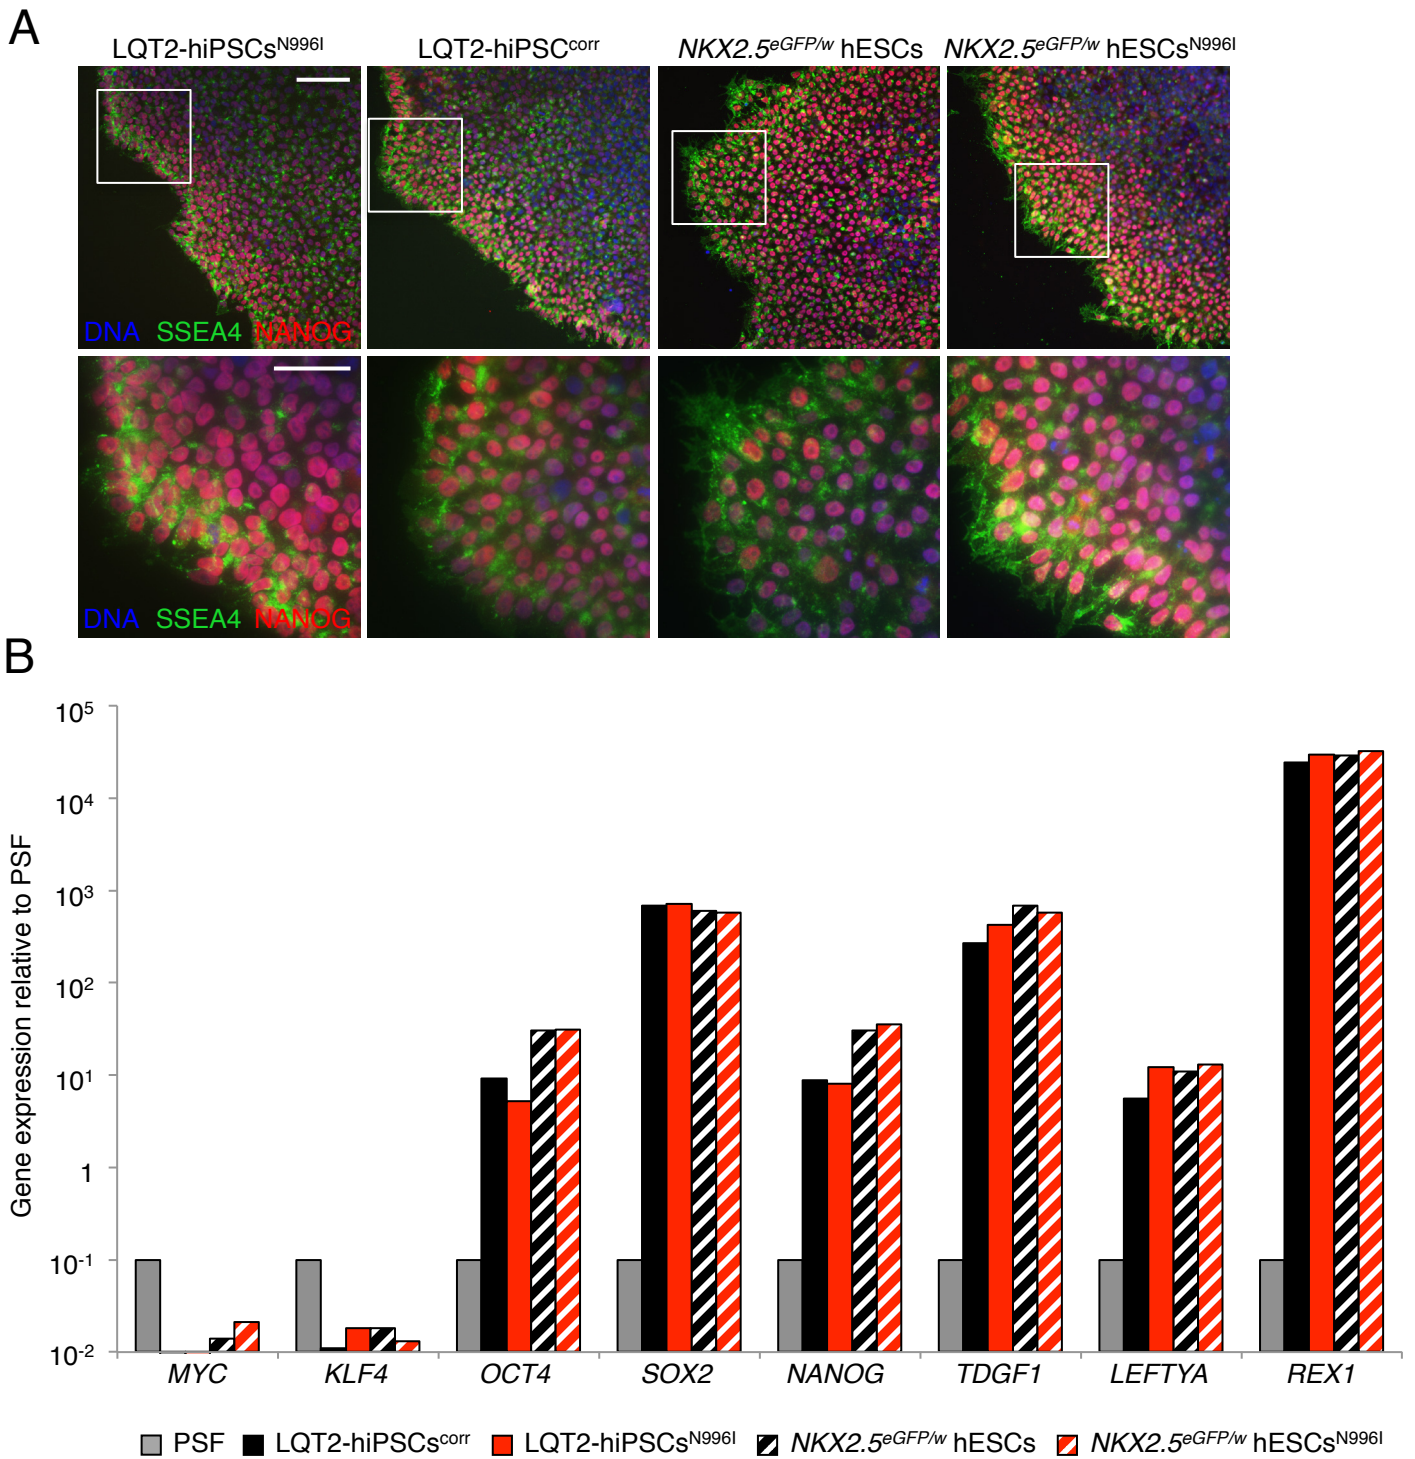

**Supplementary Figure S4.** Expression of endogenous genes associated with pluripotency in mutated and corrected hiPSCs (LQT2-hiPSCs<sup>N996I</sup> and LQT2-hiPSCs<sup>corr</sup>, respectively) and in wild-type and mutated hESCs (NKX2.5<sup>eGFP/w</sup> hESCs and NKX2.5<sup>eGFP/w</sup> hESCs<sup>N996I</sup>, respectively). (A) Immunofluorescence analysis of pluripotency markers NANOG (red) and SSEA4 (green) and nuclear staining (DNA, blue). The lower panel images are a magnification of the area framed in the corresponding upper image. Scale bars: 100  $\mu$ m (top panel), 50  $\mu$ m (bottom panel) (B) qRT-PCR analysis of the endogenous pluripotency associated-genes (MYC, KLF4, OCT4, SOX2, LEFTYA, NANOG, REX1, and TDGF1) revealing similar expression of these genes in mutated and corrected hiPSCs and from wild-type and mutated hESCs. Expression values are relative to the primary skin fibroblasts from which LQT2-hiPSCs were derived (PSF, grey bars).

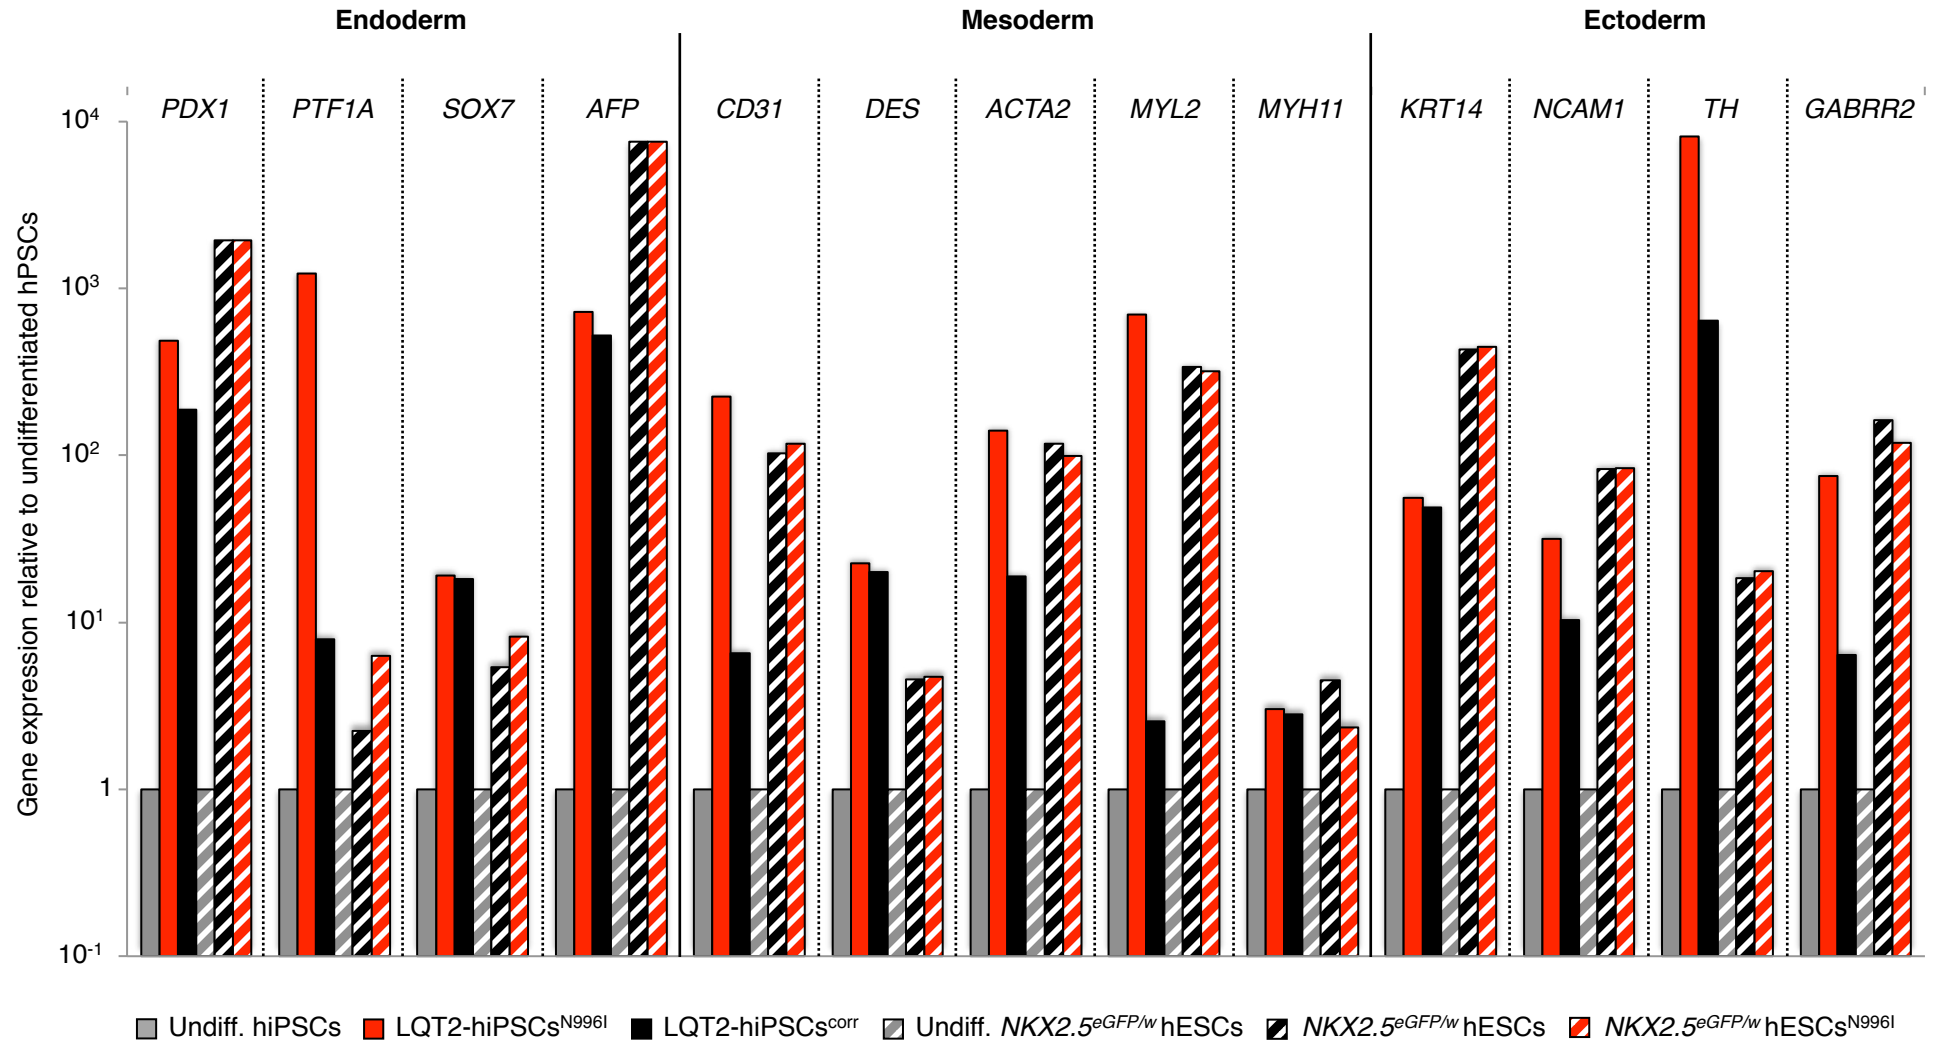

**Supplementary Figure S5.** Up-regulation of lineage markers representative of the three embryonic germ layers in the targeted human pluripotent stem cell (hPSC) lines at day 21 following spontaneous differentiation. The bar graph shows qRT-PCR analysis of markers of the three different germ layers, endoderm (*PDX1*, *PTF1A*, *SOX7*, and *AFP*), mesoderm (*CD31*, *DES*, *ACTA2*, *MYL2*, and *MYH11*), and ectoderm (*KRT14*, *NCAM1*, *TH*, and *GABRR2*) in embryoid bodies at day 21 of *in vitro* differentiation from LQT2-hiPSCs<sup>N996I</sup> (red bars), the targeted LQT2-hiPSCs<sup>corr</sup> (black bars), the NKX2.5<sup>eGFP/w</sup> hESCs (black and white striped bars), and the targeted NKX2.5<sup>eGFP/w</sup> hESCs<sup>N996I</sup> (red and white striped bars). Gene expression values are relative to corresponding undifferentiated (Undiff.) hPSCs, LQT2-hiPSCs<sup>N996I</sup> (grey bar) and NKX2.5<sup>eGFP/w</sup> hESCs (gray and white striped bars) and normalized to *GAPDH*.



**A**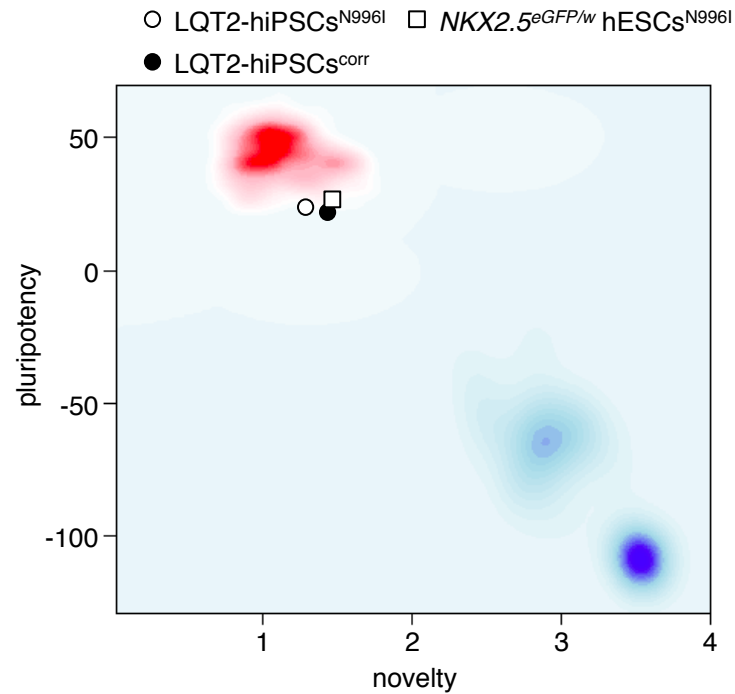**B**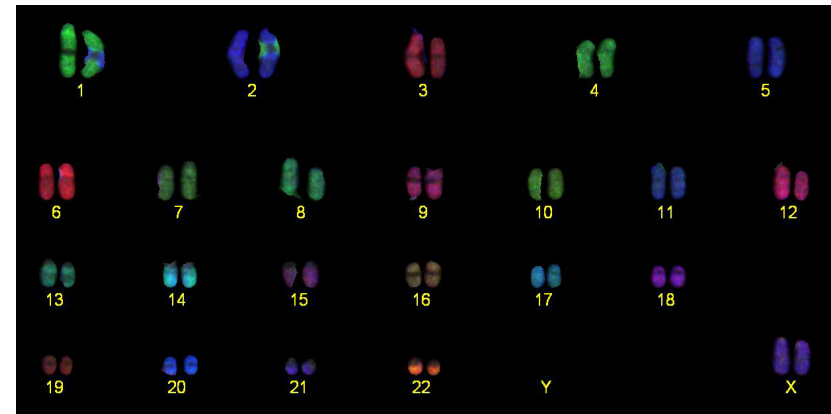**C**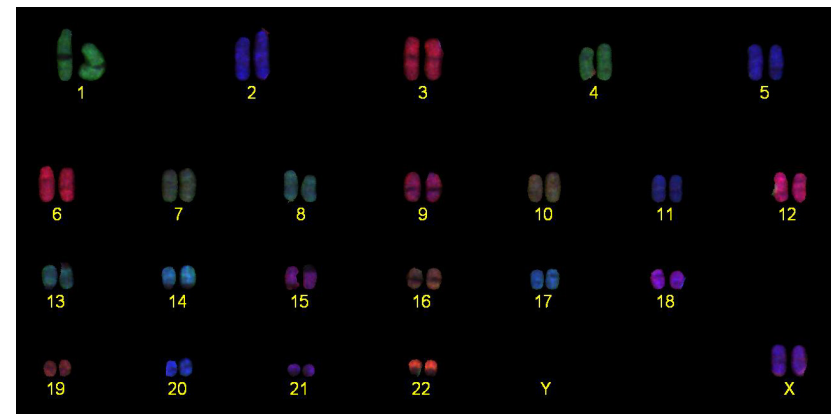

**Supplementary Figure S6.** Targeted LQT2-hiPSCs<sup>corr</sup> and *NKX2.5<sup>eGFP/w</sup>* hESCs<sup>N996I</sup> are pluripotent and maintain a normal karyotype. (A) PluriTest analysis of LQT2-hiPSCs<sup>N996I</sup> (empty circle), LQT2-hiPSCs<sup>corr</sup> (black circle), and *NKX2.5<sup>eGFP/w</sup>* hESCs<sup>N996I</sup> (empty square). All tested lines have a high “pluripotency score” and a low “novelty score” indicating that they resemble normal human pluripotent stem cells (in red). (B) COBRA-FISH cytogenetic analysis of LQT2-hiPSCs<sup>corr</sup> showing a normal 46 XX karyotype. (C) COBRA-FISH cytogenetic analysis of *NKX2.5<sup>eGFP/w</sup>* hESCs<sup>N996I</sup> showing a normal 46 XX karyotype.

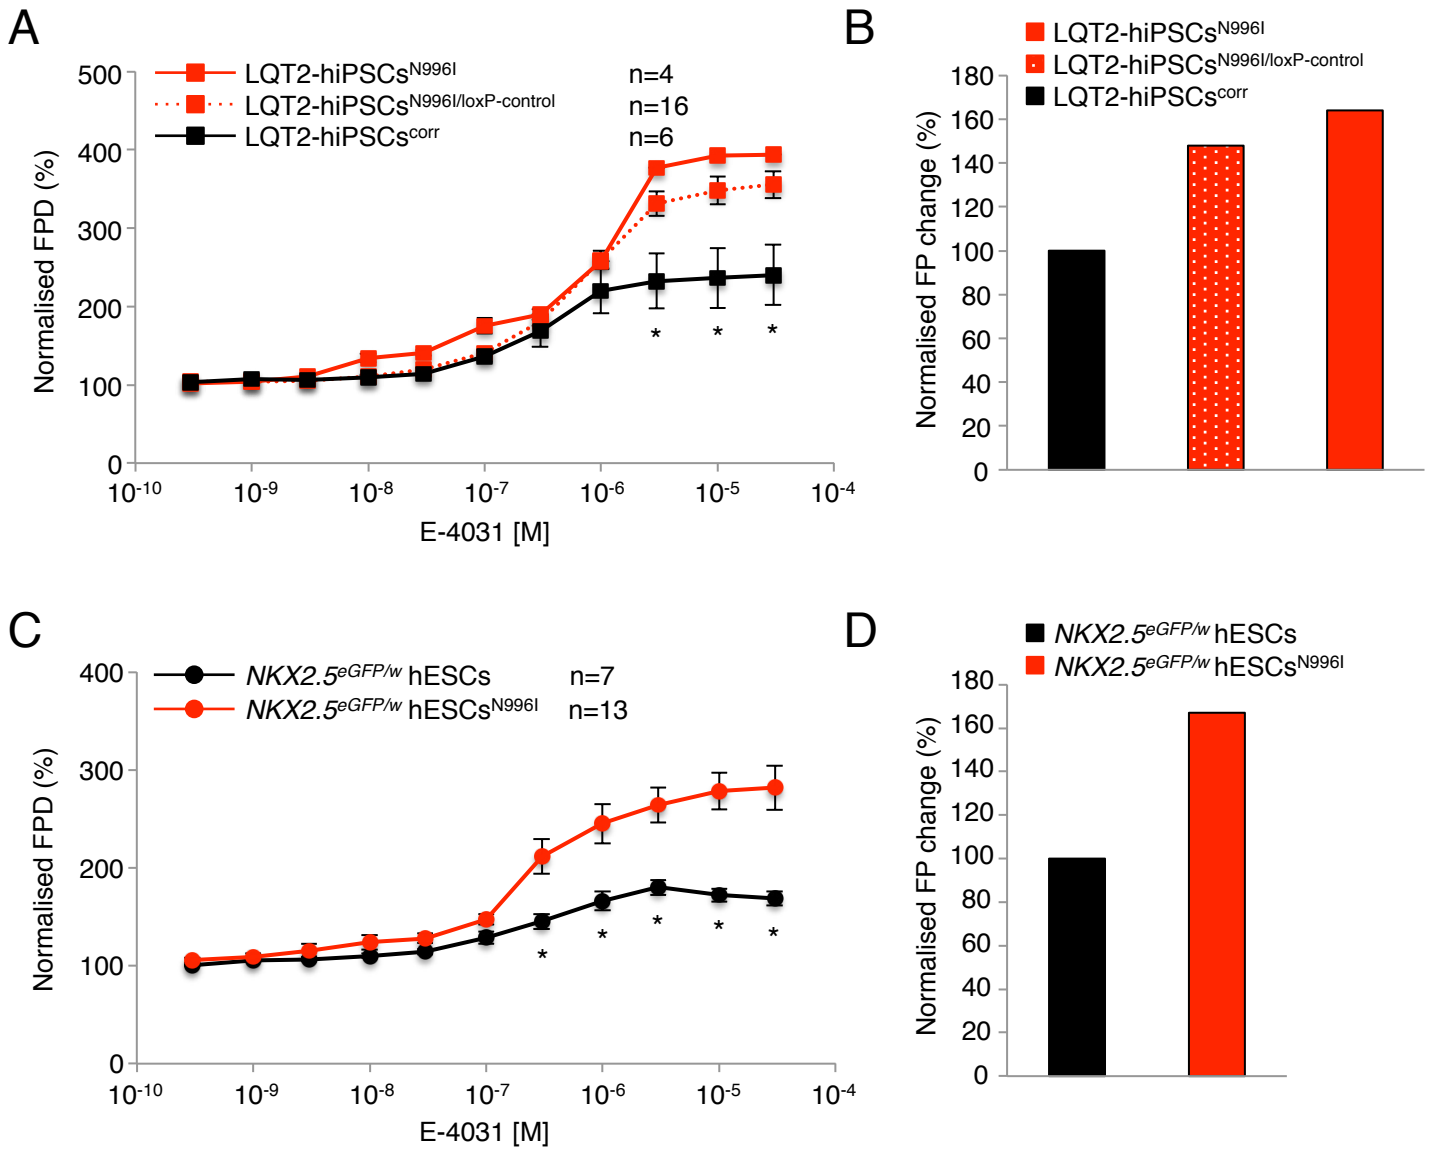

**Supplementary Figure S7.** The effect of  $I_{Kr}$  blockade induced by increasing amounts of E-4031 on cardiac repolarization in hPSC-derived CMs. **(A)** FPD dose response relationship in presence of increasing amounts of E-4031 in mutated (LQT2-hiPSCs<sup>N996I</sup>), loxP-control (LQT2-hiPSCs<sup>N996I/loxP-control</sup>) and corrected (LQT2-hiPSCs<sup>corr</sup>) patient-specific hiPSCs **(B)** Bar graphs representing normalised field potential (FP) change induced by 30  $\mu$ M E-3041 in mutated vs. corrected LQT2-hiPSCs. **(C)** FPD dose response relationship in presence of increasing amounts of E-4031 in wild-type and mutated hESCs (NKX2.5<sup>eGFP/w</sup> hESCs and LQT2-hESCs<sup>N996I</sup>, respectively). **(D)**. Bar graphs representing normalised field potential (FP) change induced by 30  $\mu$ M E-3041 in mutated vs. wild-type hESCs. \* indicates statistical significance ( $P < 0.05$ ; two-way rmANOVA).

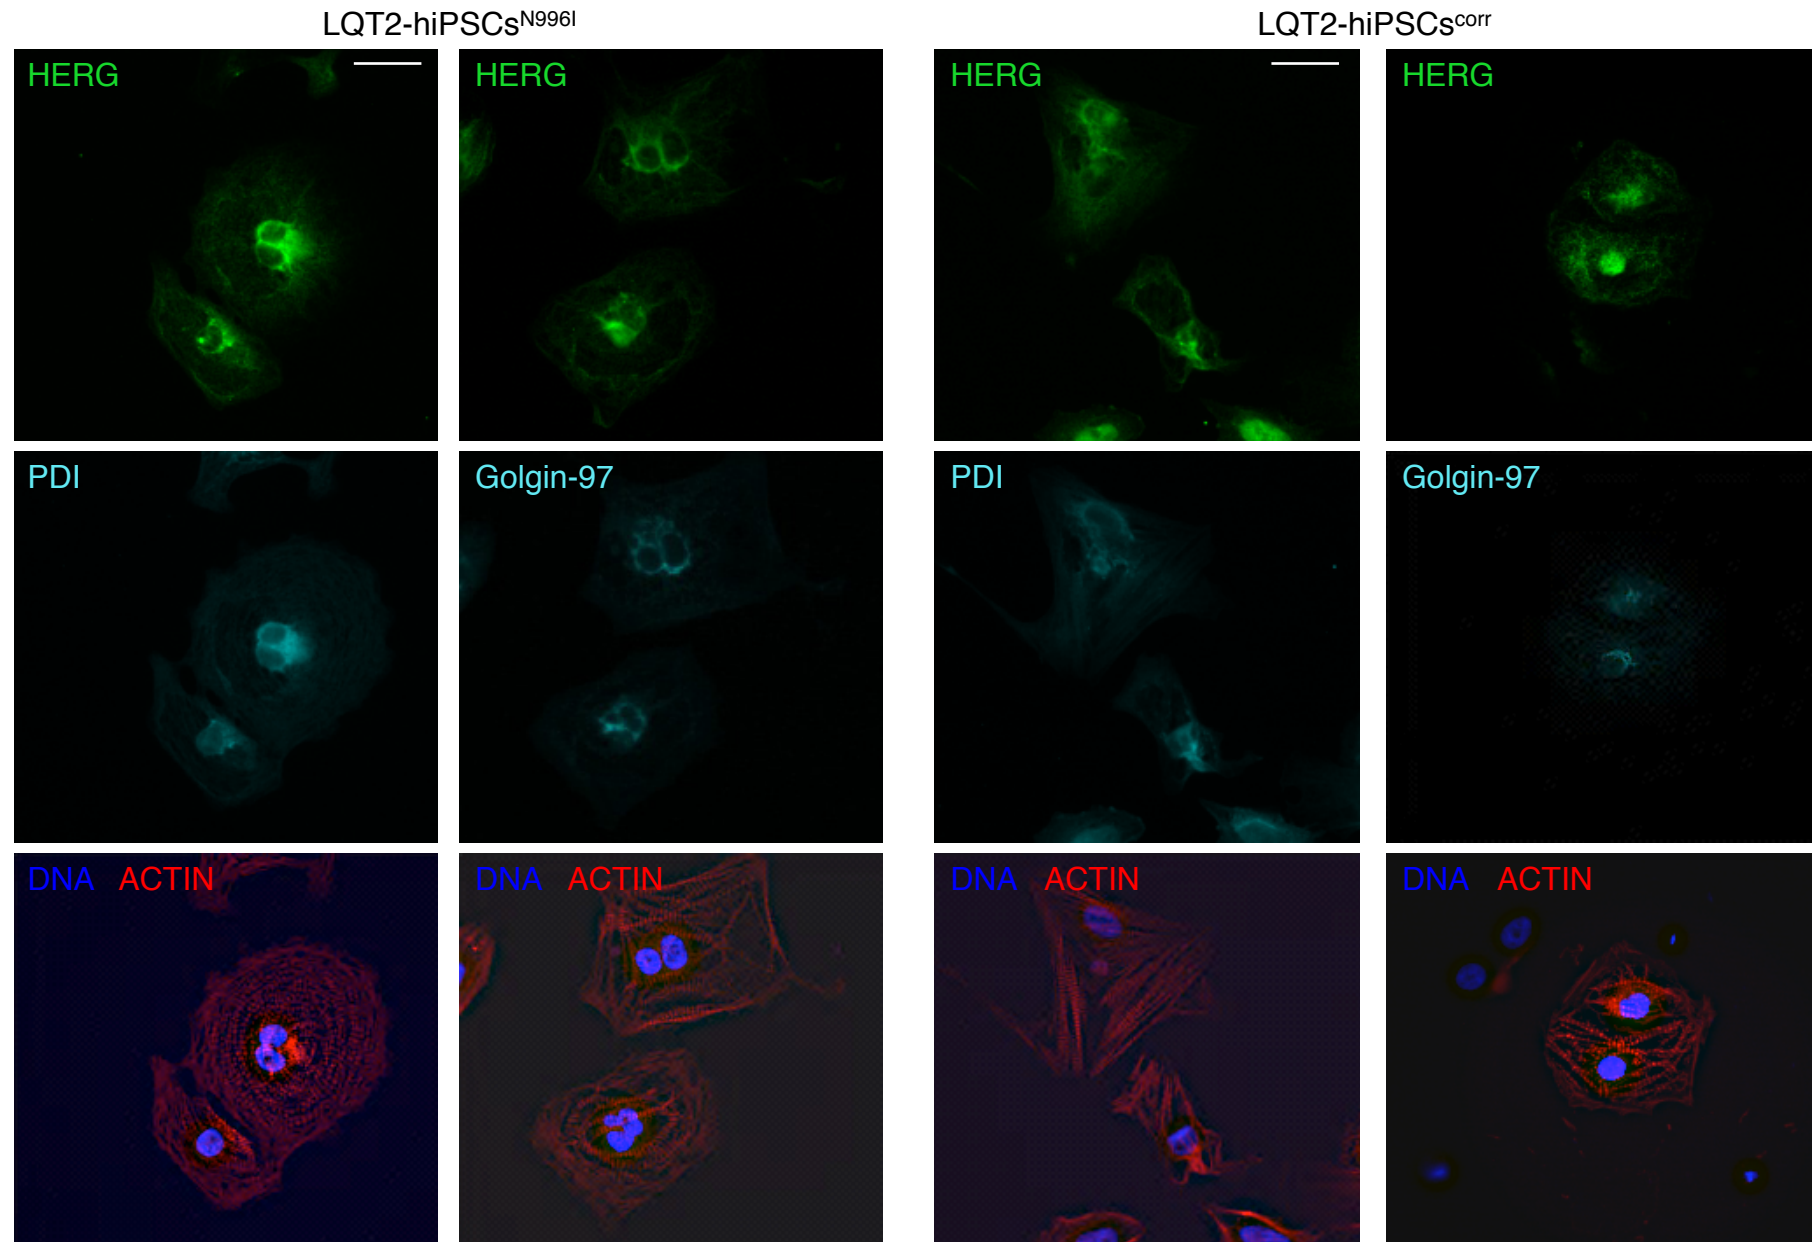

**Supplementary Figure S8.** HERG channel partially overlaps with ER and Golgi compartments in human CMs derived from mutated and corrected LQT2-hiPSCs. Immunofluorescence images of HERG channel (green) and of either the ER marker protein disulfide isomerase (PDI, cyan) or the Golgi compartment marker Golgin-97 (cyan) in representative human CMs derived from mutated and corrected LQT2-hiPSCs. Nuclei are stained in blue and ACTIN is shown in red by phalloidin stain. Scale bar: 25  $\mu$ m.

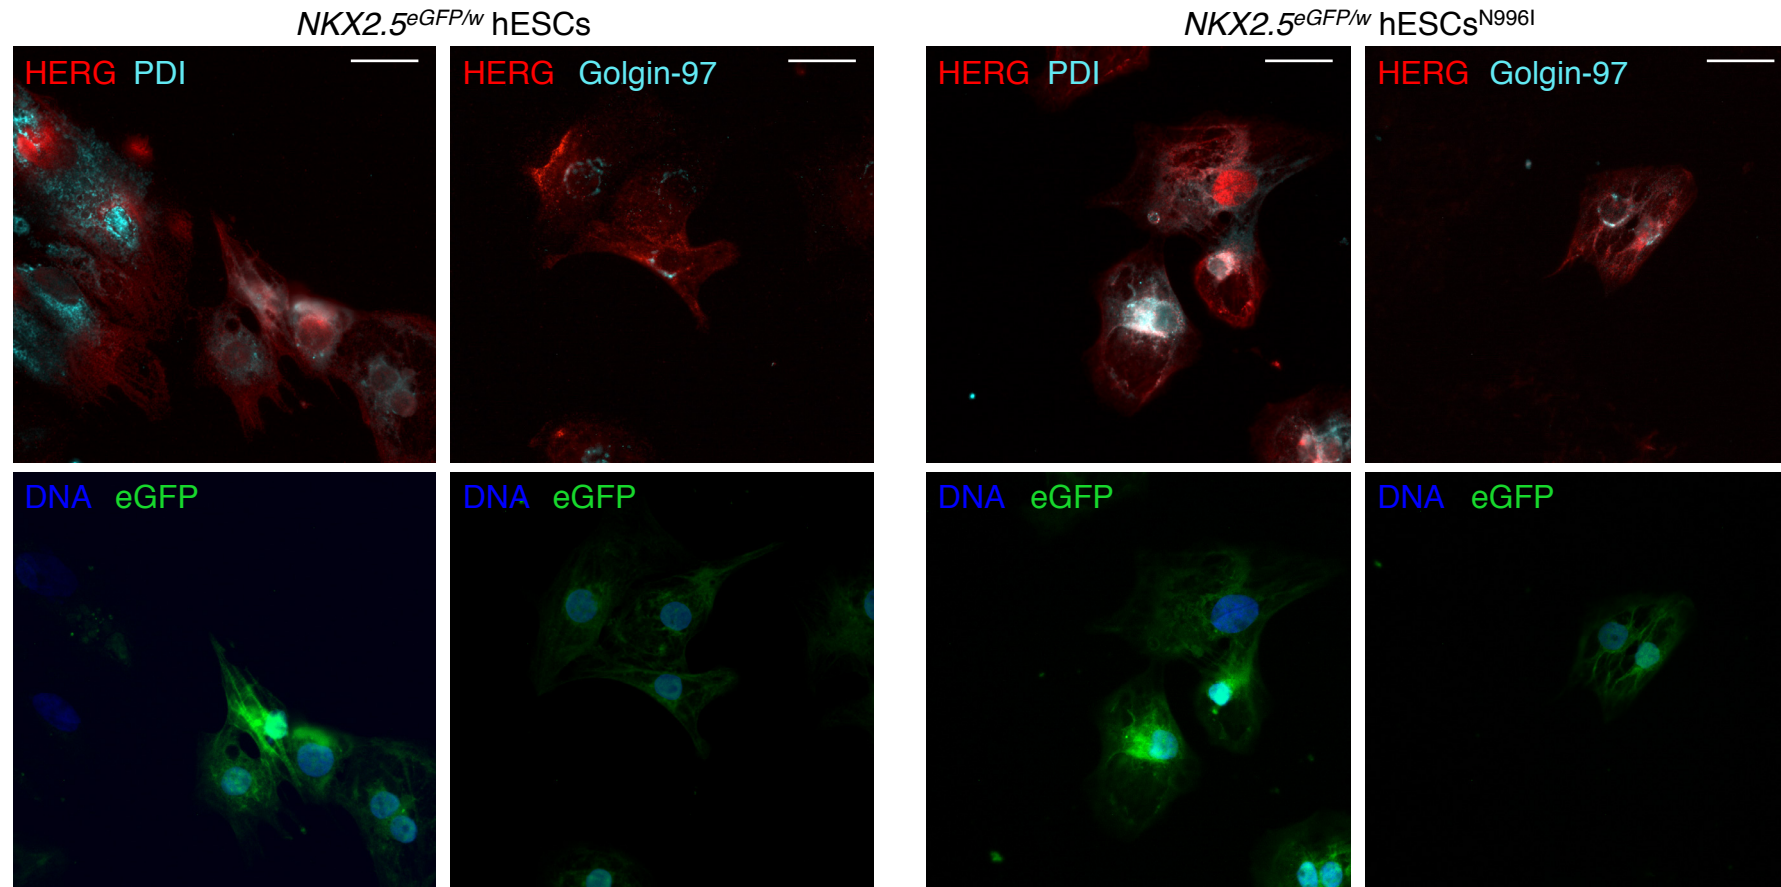

**Supplementary Figure S9.** HERG channel partially overlaps with ER and Golgi compartments in human CMs derived from wild-type and mutated hESCs. Immunofluorescence images of HERG channel (red) and of either the ER marker protein disulfide isomerase (PDI, cyan) or the Golgi compartment marker Golgin-97 (cyan) in representative human CMs derived from wild-type and mutated hESCs. Nuclei are stained in blue and eGFP is shown in green. Scale bar: 25  $\mu$ m.

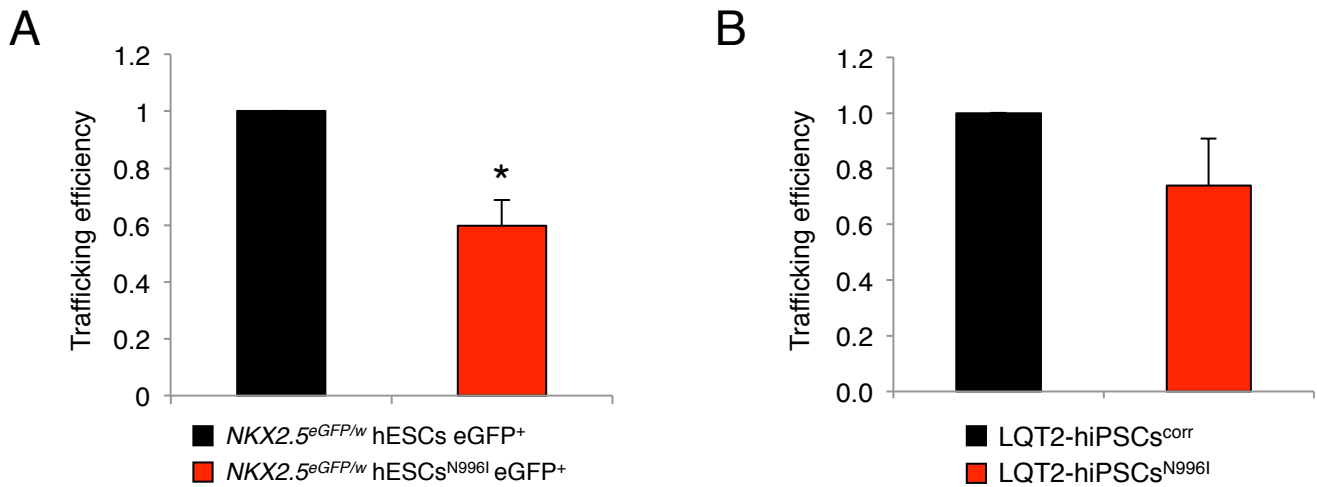

**Supplementary Figure S10.** Trafficking efficiency in hPSC-derived CMs. **(A)** Average trafficking efficiency in wild-type and mutated hESCs ( $NKX2.5^{eGFP/w}$  hESCs and  $NKX2.5^{eGFP/w}$  hESCs<sup>N996I</sup>, respectively) calculated from the densitometric analysis of Western blot experiments; values are presented as mean  $\pm$ s.e.m., n=4. \* indicates statistical significance (P=0.029, Mann-Whitney test) **(B)** Average trafficking efficiency in corrected and mutated hiPCs (LQT2-hiPCs<sup>corr</sup> and LQT2-hiPSCs<sup>N996I</sup>, respectively) calculated from the densitometric analysis of Western blot experiments; values are presented as mean  $\pm$ s.e.m., n=2. Trafficking efficiency=fg/(fg+cg), where fg=fully-glycosylated 155 kDa band and cg=core-glycosylated 135 kDa band.

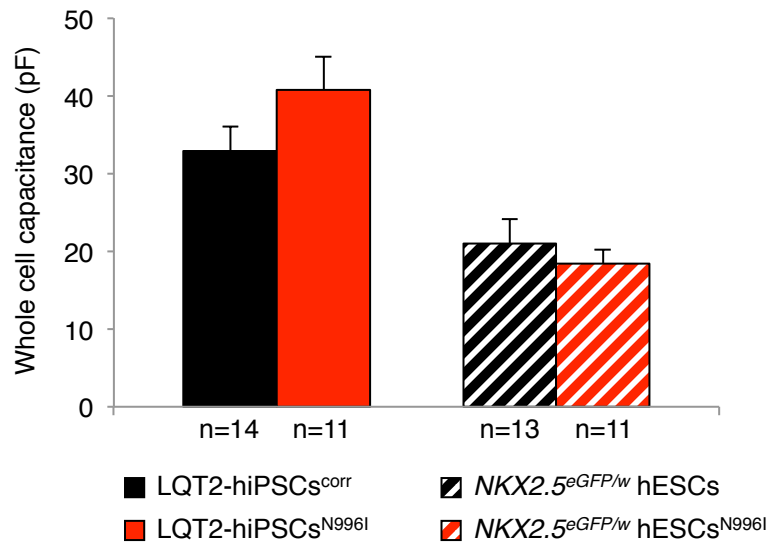

**Supplementary Figure S11.** Cell membrane capacitance in hPSC-derived CMs. The bar graph shows the average whole cell capacitance measured in corrected and mutated hiPSC-CMs (LQT2-hiPSC<sup>corr</sup> and LQT2-hiPSC<sup>N996I</sup>, respectively), and in wild-type and mutated hESCs (NKX2.5<sup>eGFP/w</sup> hESCs and NKX2.5<sup>eGFP/w</sup> hESCs<sup>N996I</sup>, respectively). Values are presented as mean  $\pm$  s.e.m. where the n. is indicated under each bar.
